# Supplementary material
Source: PubMed Central journal article supplement (PMC9376936)

Supplementary Figure 1

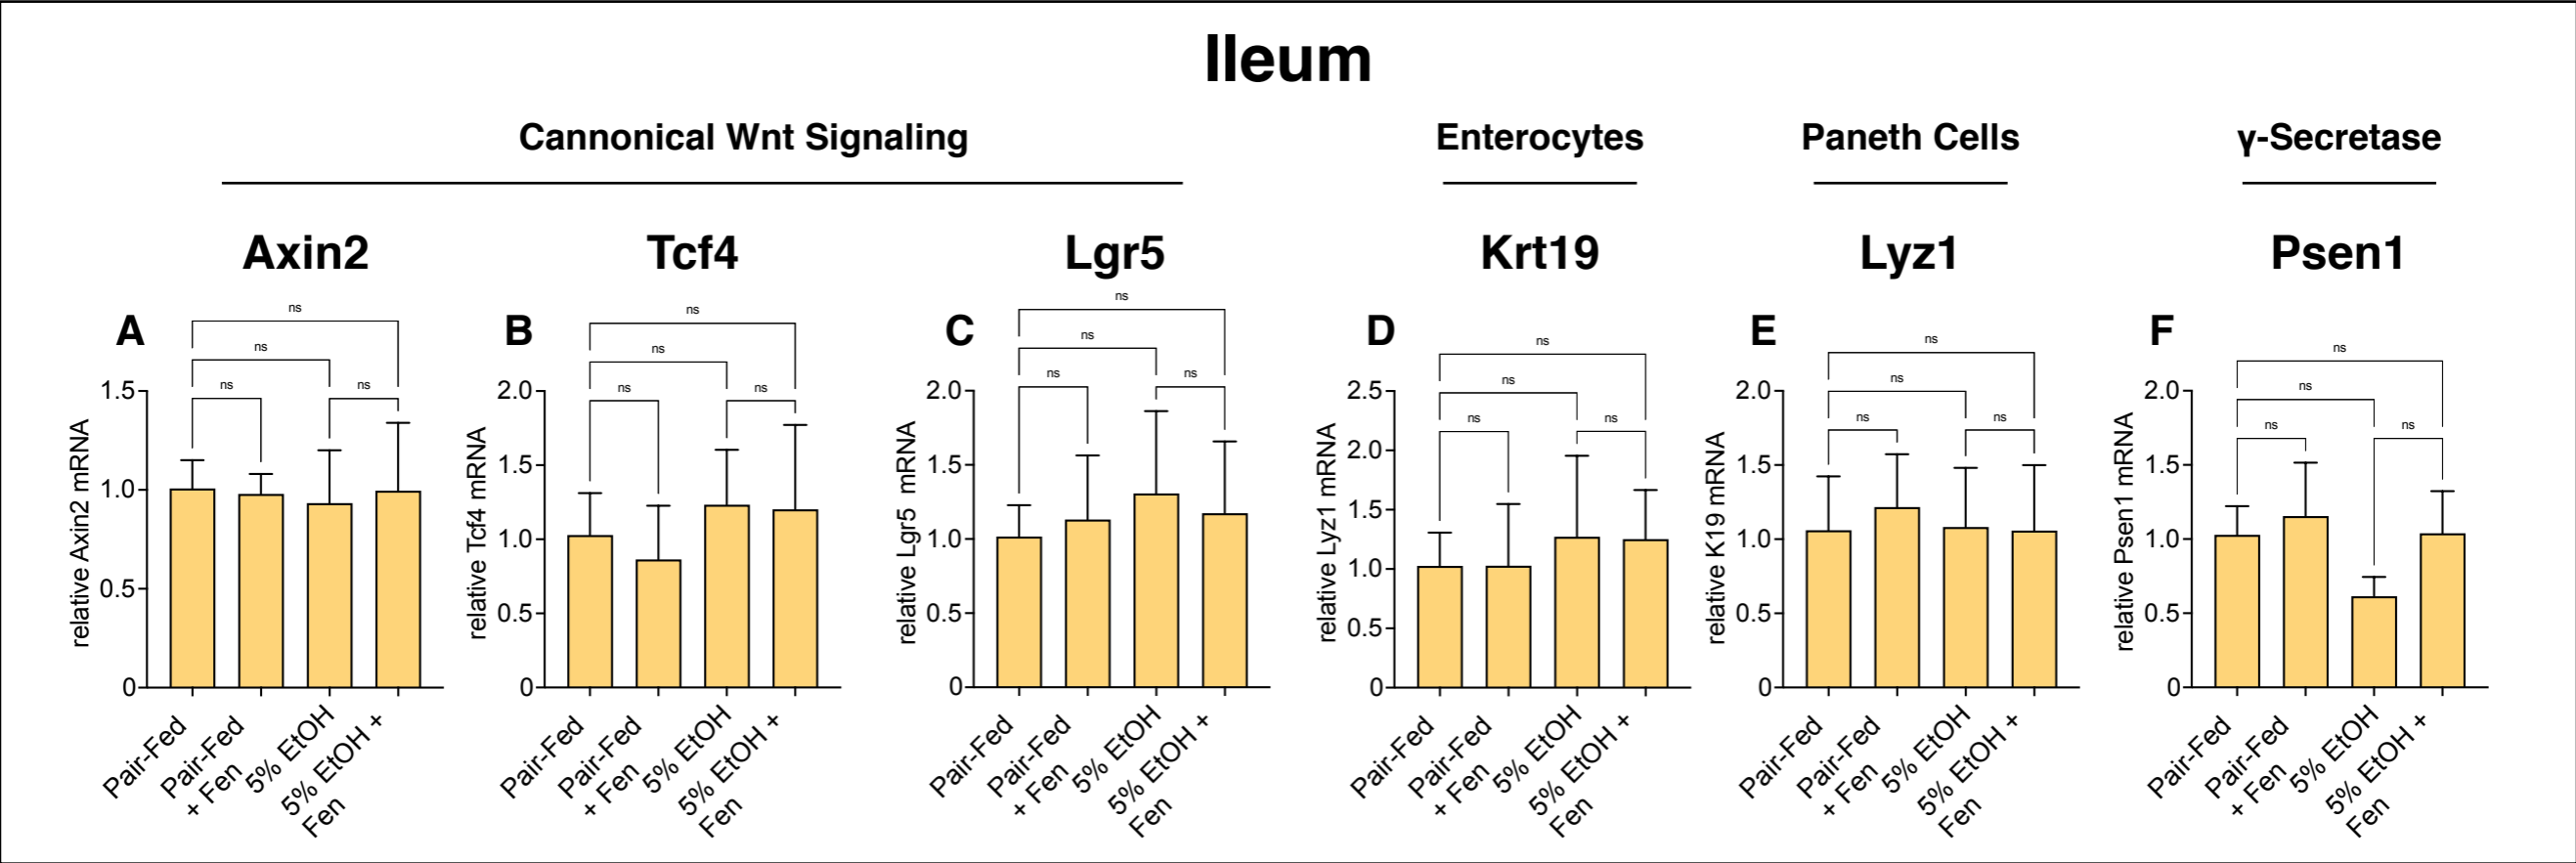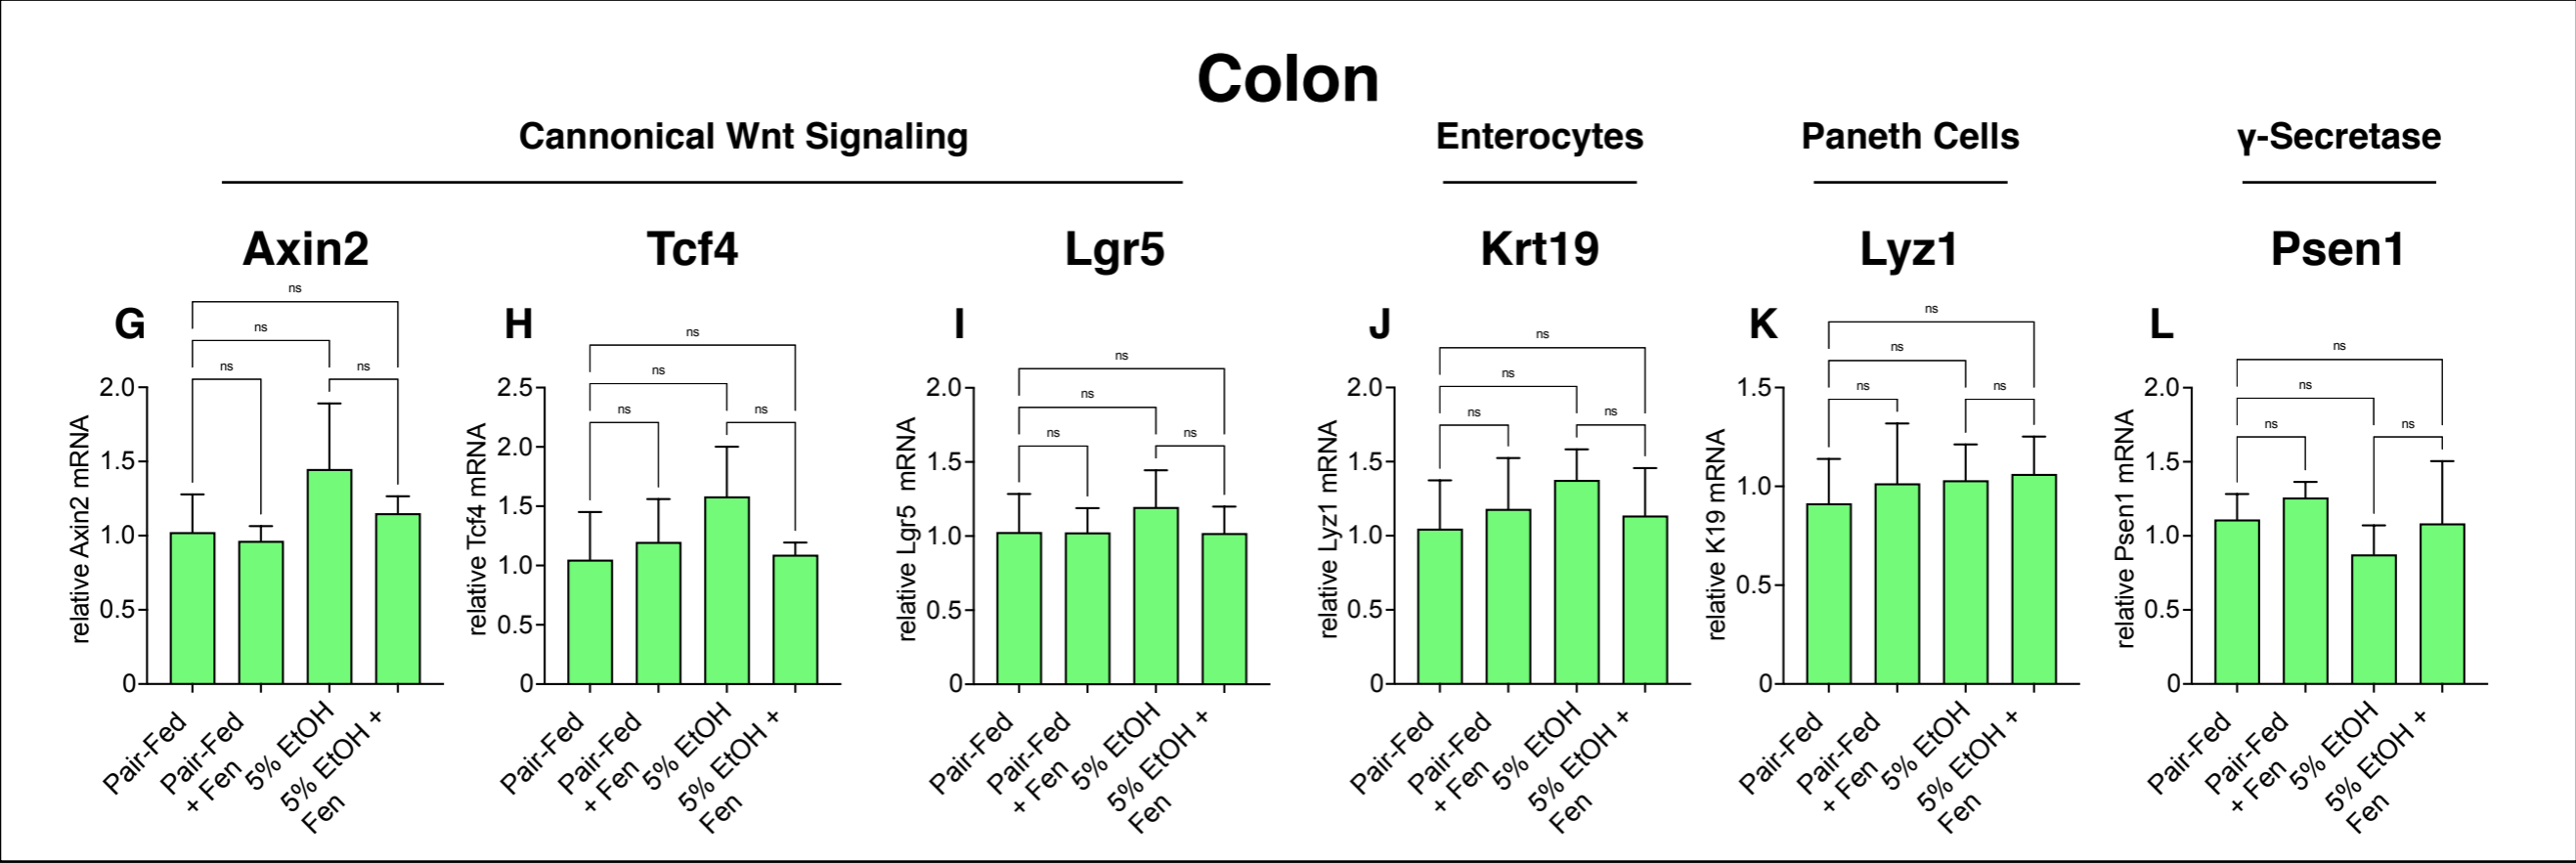

Supplementary Figure 2

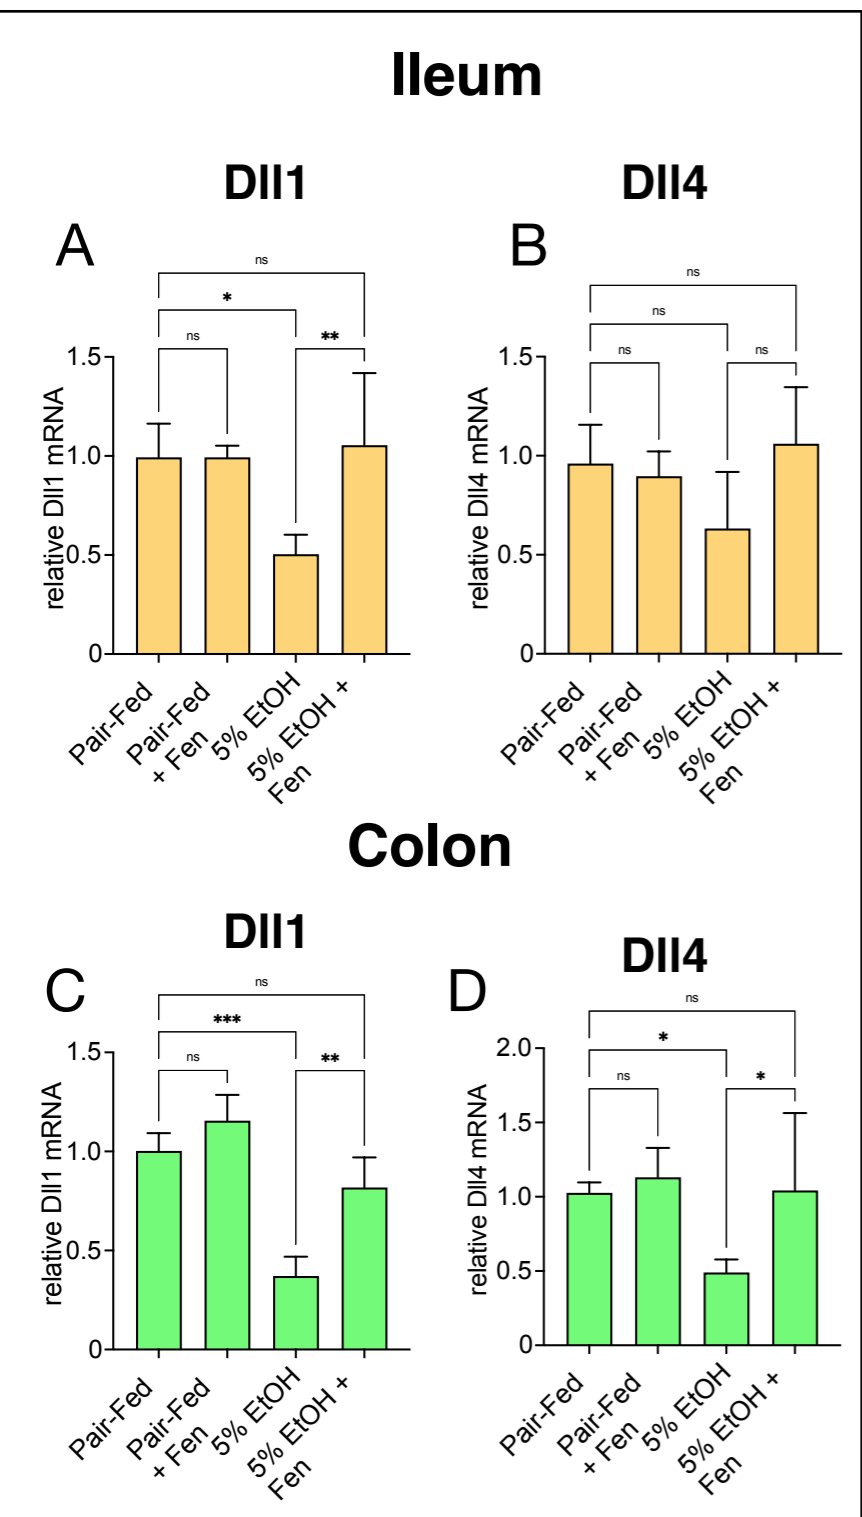

**Ileum DII1**

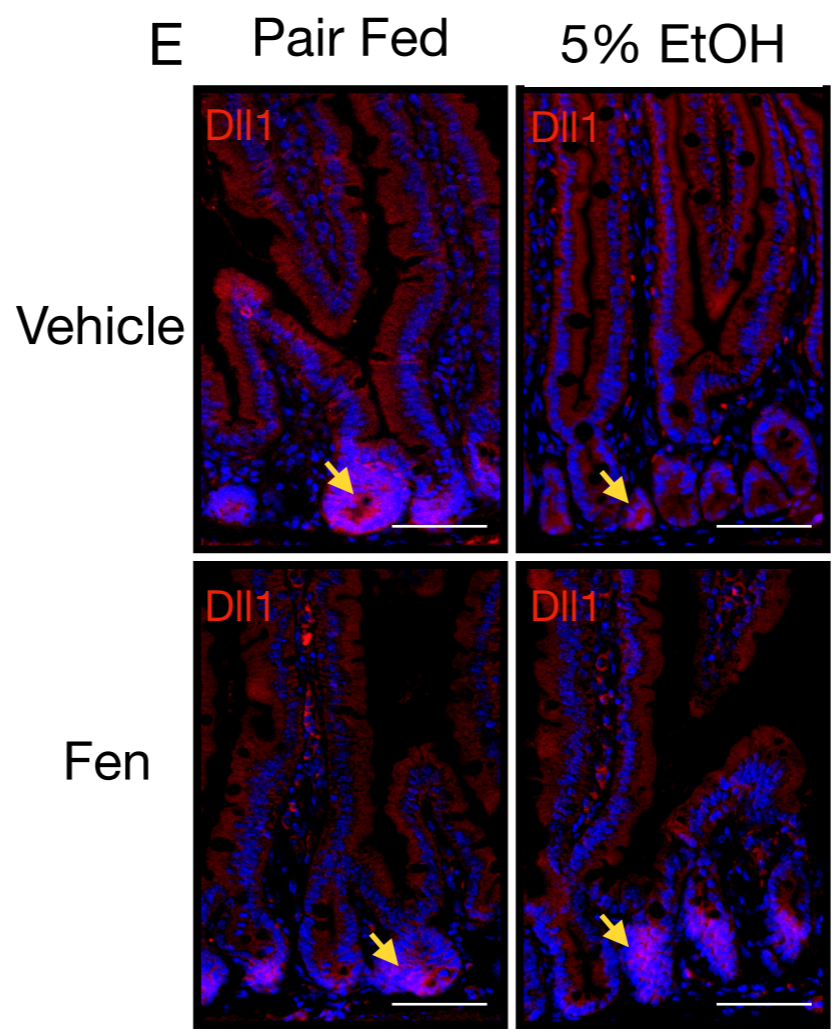

**Colon DII1**

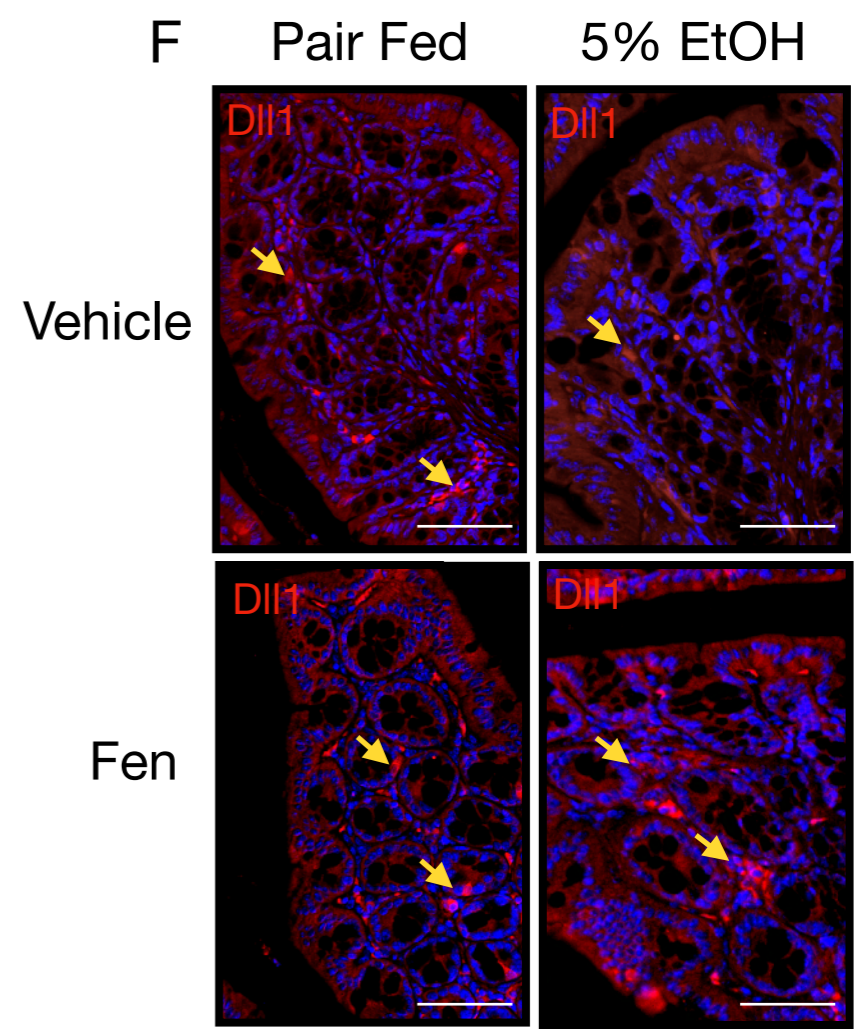

**Ileum DII1**

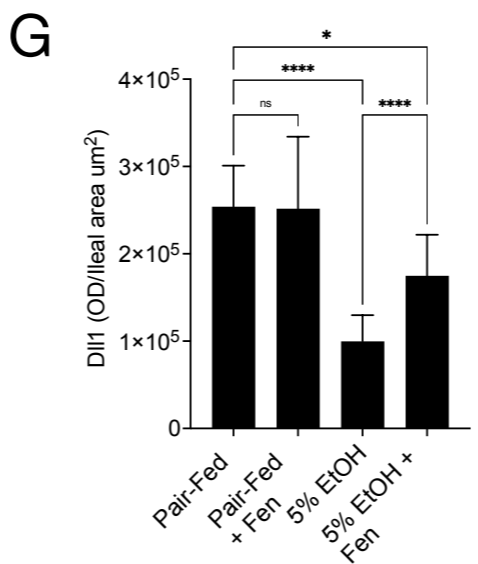

**Colon DII1**

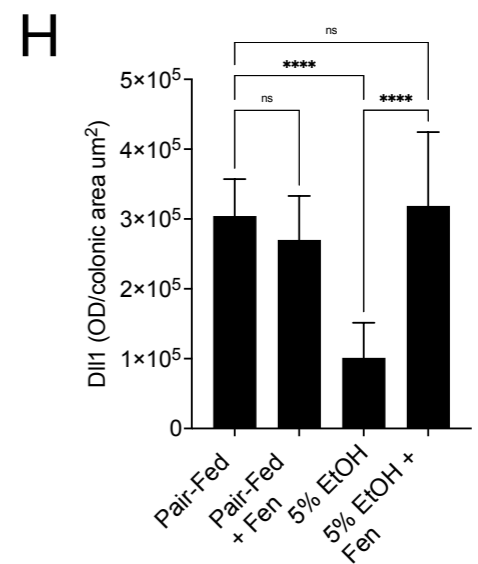

Supplementary Figure 3

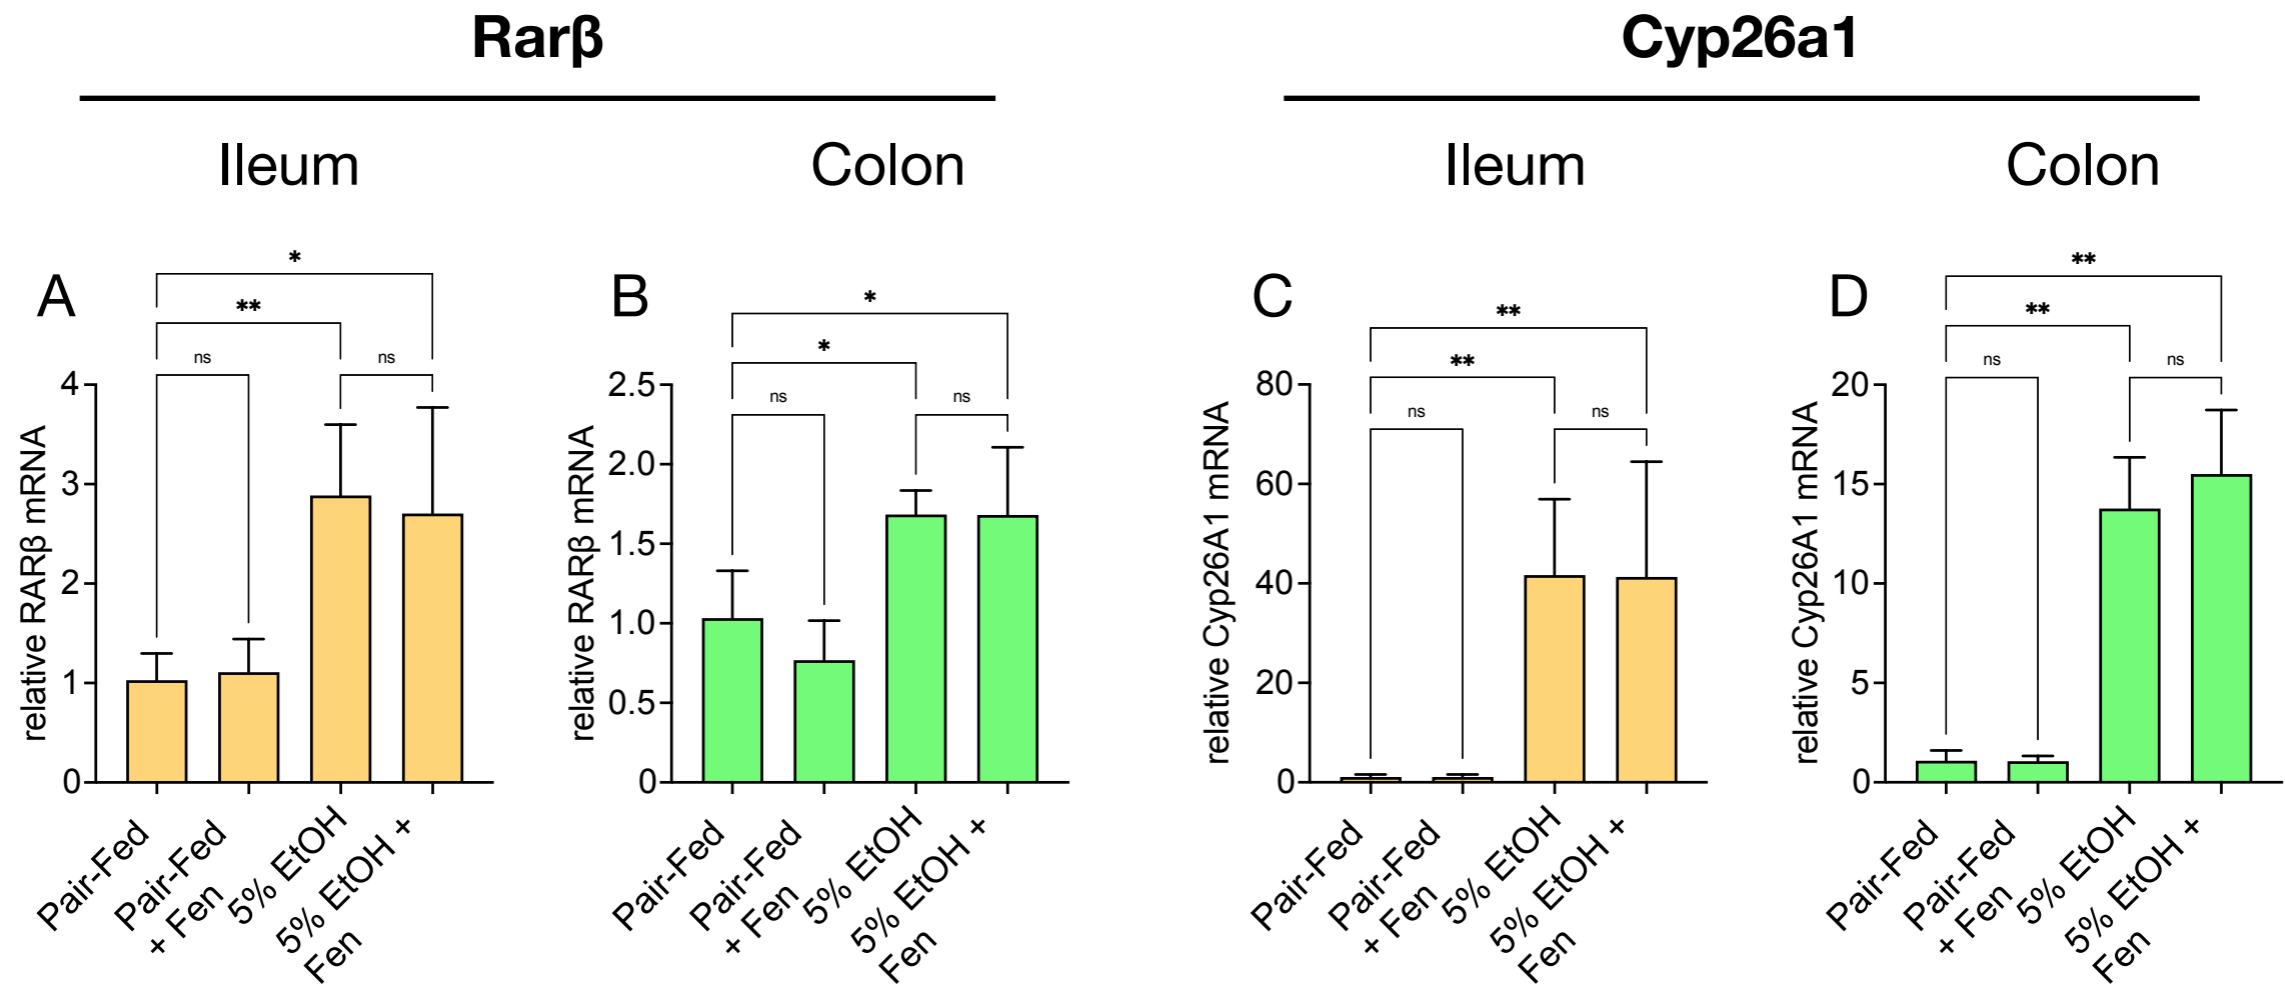

Supplementary Figure 4

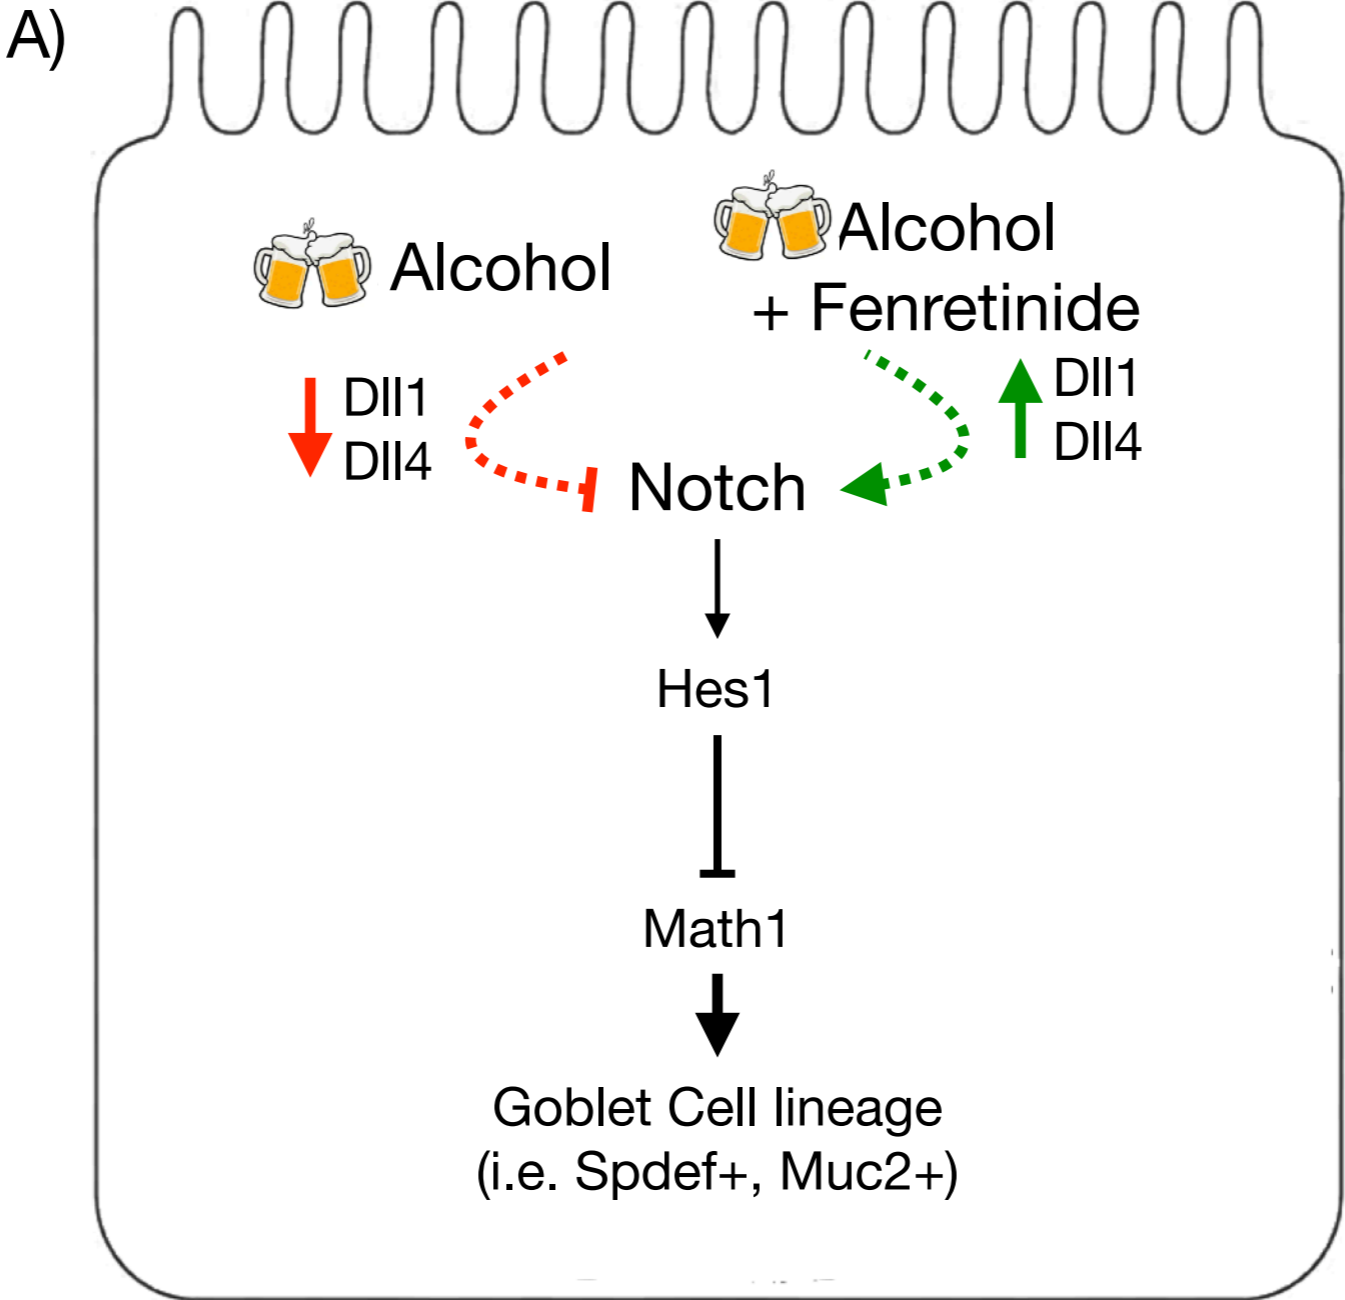

Supplement: NIHMS1825382-supplement-Supplementary.pdf [file NIHMS1825382-supplement-Supplementary.pdf]
