# Supplementary material
Source: PubMed Central journal article supplement (PMC9376936)
Supplement: NIHMS1825382-supplement-Table_1.pdf [file NIHMS1825382-supplement-Table_1.pdf]

# Supplementary Table 1

| <b>Supplementary Table 1: qPCR Primer Sequences</b> |                     |                              |                               |
|-----------------------------------------------------|---------------------|------------------------------|-------------------------------|
| <b>Gene Symbol</b>                                  | <b>NCBI Ref Seq</b> | <b>Forward Primer(5'-3')</b> | <b>Reverse Primer (5'-3')</b> |
| Muc2                                                | NM_023566.4         | GCTGACGAGTGGTTGGTGAATG       | GATGAGGTGGCAGACAGGAGAC        |
| Muc5ac                                              | NM_010844           | CCACTTTCTCCTTCTCCACACC       | GGTTGTTCGATGCAGCCTTGCTT       |
| Muc6                                                | NM_181729.3         | GGAACAAACAGTCTGGACCACC       | CTTCGGTATGGATGTAGGAGGC        |
| Notch1                                              | NM_008714.3         | GCTGCCTCTTTGATGGCTTCGA       | CACATTCGGCACTGTTACAGCC        |
| Notch2                                              | NM_010928.2         | CCACCTGCAATGACTTCATCGG       | TCGATGCAGGTGCCTCCATTCT        |
| Psen1                                               | NM_001362271.1      | GAGACTGGAACACAACCATAGCC      | AGAACACGAGCCCGAAGGTGAT        |
| Hes1                                                | NM_008235.2         | GGAAATGACTGTGAAGCACCTCC      | GAAGCGGGTCACCTCGTTCATG        |
| Hey1                                                | NM_010423.2         | CCAACGACATCGTCCCAGGTTT       | CTGCTTCTCAAAGGCACTGGGT        |
| Math1                                               | NM_007500.5         | CTGGTAAGGAGAAGCGGCTGTG       | CCATTCACCTGTTTGCTGGAAGG       |
| Creb3l1                                             | NM_011957.2         | AGCCTTGTGCTTCGTTCTGGTG       | CATCGTAGAACAGTAGGCTTCGG       |
| Clca1                                               | NM_017474.2         | CTGCCGCTAAAGAGCTTGAGCA       | ATCGCCGCATTTCTGAGGAGA         |
| Spdef                                               | NM_013891.4         | CACGTTGGATGAGCACTCGCTA       | AGCCACTTCTGCACGTTACCAG        |
| Agr2                                                | NM_011783.2         | GCAGTTTGTTCCTCAACCTGG        | GTATCGTCCAGTGATGTCTGCC        |
| Klf4                                                | NM_010637.3         | CTATGCAGGCTGTGGCAAACCC       | TTGCGGTAGTGCCTGGTCAGTT        |
| Dll1                                                | NM_007865.3         | GCTGGAAGTAGATGAGTGTGCTC      | CACAGACCTTGCCATAGAAGCC        |
| Dll4                                                | NM_019454.3         | GGGTCCAGTTATGCCTGCGAAT       | TTCGGCTTGGACCTCTGTTTCCAG      |
| Axin2                                               | NM_015732.4         | ATGGAGTCCCTCCTTACCGCAT       | GTTCCACAGGCGTCATCTCCTT        |
| Tcf4                                                | NM_001083967.1      | CCTCCAATCCTTCAACTCCTGTG      | TCCAAACGGTCTTCGATTCCGGC       |
| Lgr5                                                | NM_010195.2         | AGAGCCTGATACCATCTGCAAAC      | TGAAGGTCGTCCACACTGTTGC        |
| Cyp26a1                                             | NM_007811.2         | GAAACATTGCAGATGGTGCTTC       | CGGCTGAAGGCCTGCATAATCAC       |
| RAR $\beta$                                         | NM_001289761.1      | ACCAGATCACCTGCTCAAA          | GTCAGTCAGAGGACCGAAGC          |
| Kr19 (Enterocytes)                                  | NM_008471.3         | AATGGCGAGCTGGAGGTGAAGA       | CTTGGAGTTGTCAATGGTGGCAC       |
| Lyz1 (Paneth cells)                                 | NM_013590.4         | TACAACCGTGGAGACCGAAGCA       | TGGCTGCAGTGATGTCATCCTG        |
| 36b4 (House keeping gene)                           | NM_007475.5         | AGAACAACCCAGCTCTGGAGAAA      | ACACCCTCCAGAAAGCGAGAGT        |
